# Supplementary material for: Metal ion induced allosteric transition in the catalytic activity of an artificial phosphodiesterase
Source: Royal Society of Chemistry journal article supplement (doi:10.1039/b716196d), 2007-12-12
Supplement: b716196d.pdf [file b716196d.pdf]

Supplementary information for

**Metal ion induced allosteric transition in the catalytic activity of an artificial phosphodiesterase**

Shinji Takebayashi,<sup>a</sup> Seiji Shinkai,<sup>\*a</sup> Masato Ikeda<sup>b</sup> and Masayuki Takeuchi<sup>\*c</sup>

<sup>a</sup>*Department of Chemistry and Biochemistry, Graduate School of Engineering, Kyushu University, Fukuoka 819-0395, Japan.*

<sup>b</sup>*Department of Synthetic Chemistry and Biological Chemistry, Graduate School of Engineering, Kyoto University, Kyoto 615-8510, JAPAN.*

<sup>c</sup>*Macromolecules Group, Organic Nanomaterials Center, National Institute for Materials Science, Tsukuba 305-0047, JAPAN.*

*E-mail: TAKEUCHI.Masayuki@nims.go.jp, seijitcm@mbx.nc.kyushu-u.ac.jp*

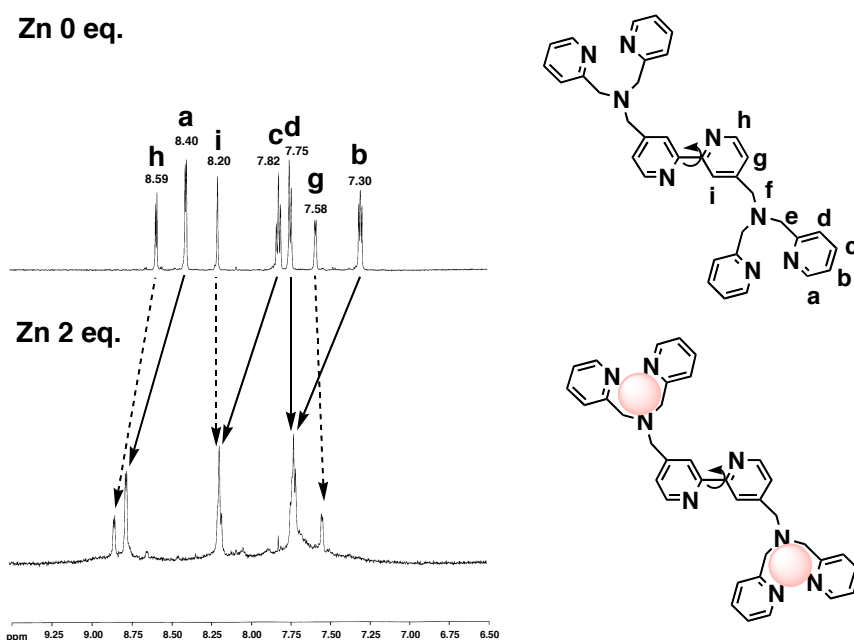

**Fig. S1.**  $^1\text{H}$  NMR spectra (9.5 ~ 6.5 ppm) for **1**+  $\text{Zn}(\text{ClO}_4)_2$ ;  $[\mathbf{1}] = 1.0$  mM, pD 7.7 in  $\text{D}_2\text{O}$  / ethanol- $d_6 = 2 / 1$  (v / v) at 5 °C.

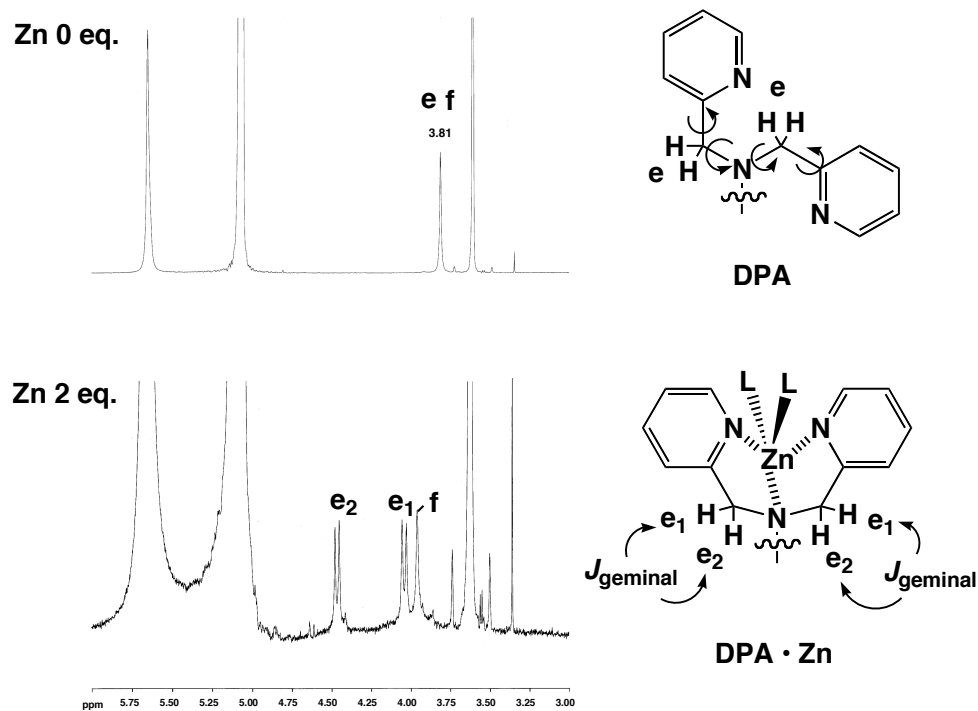

**Fig. S2.**  $^1\text{H}$  NMR spectra (6.0 ~ 3.0 ppm) for **1**+  $\text{Zn}(\text{ClO}_4)_2$ ;  $[\mathbf{1}] = 1.0$  mM, pD 7.7 in  $\text{D}_2\text{O}$  / ethanol- $d_6 = 2 / 1$  (v / v) at 5 °C.

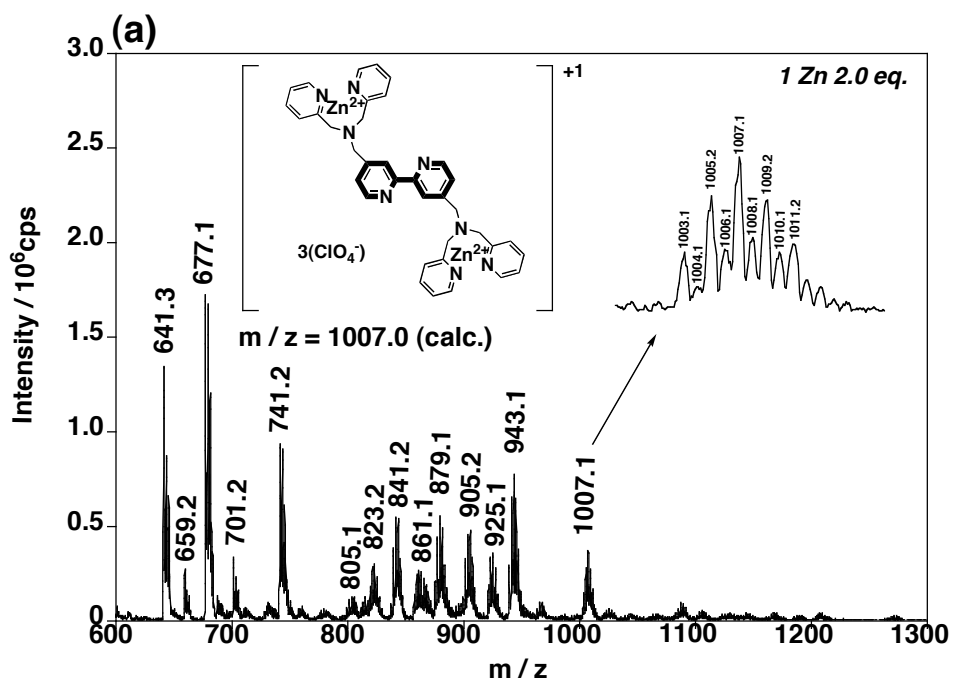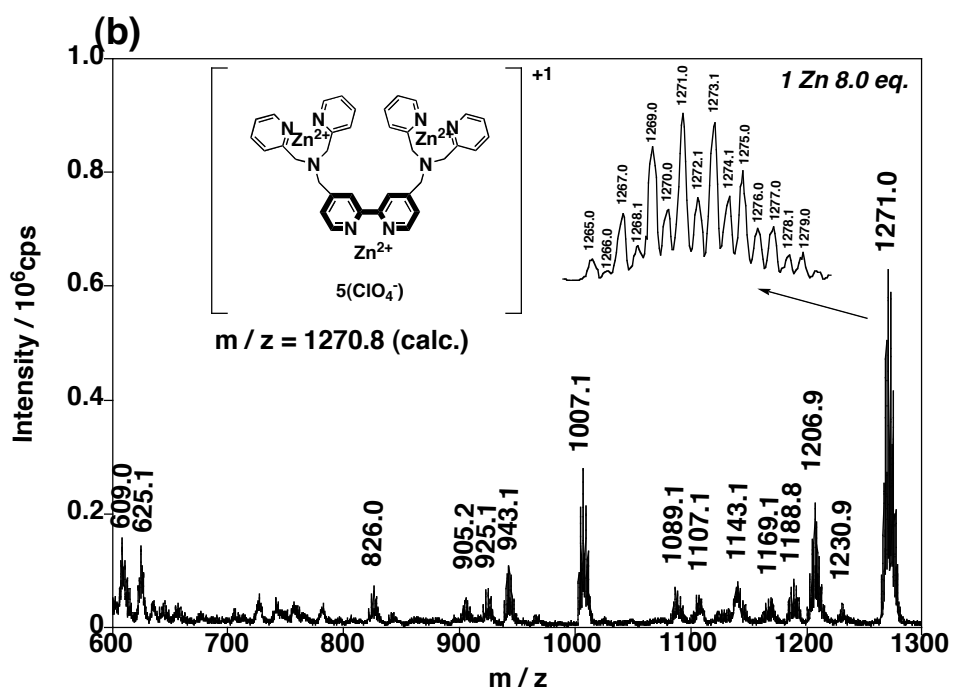

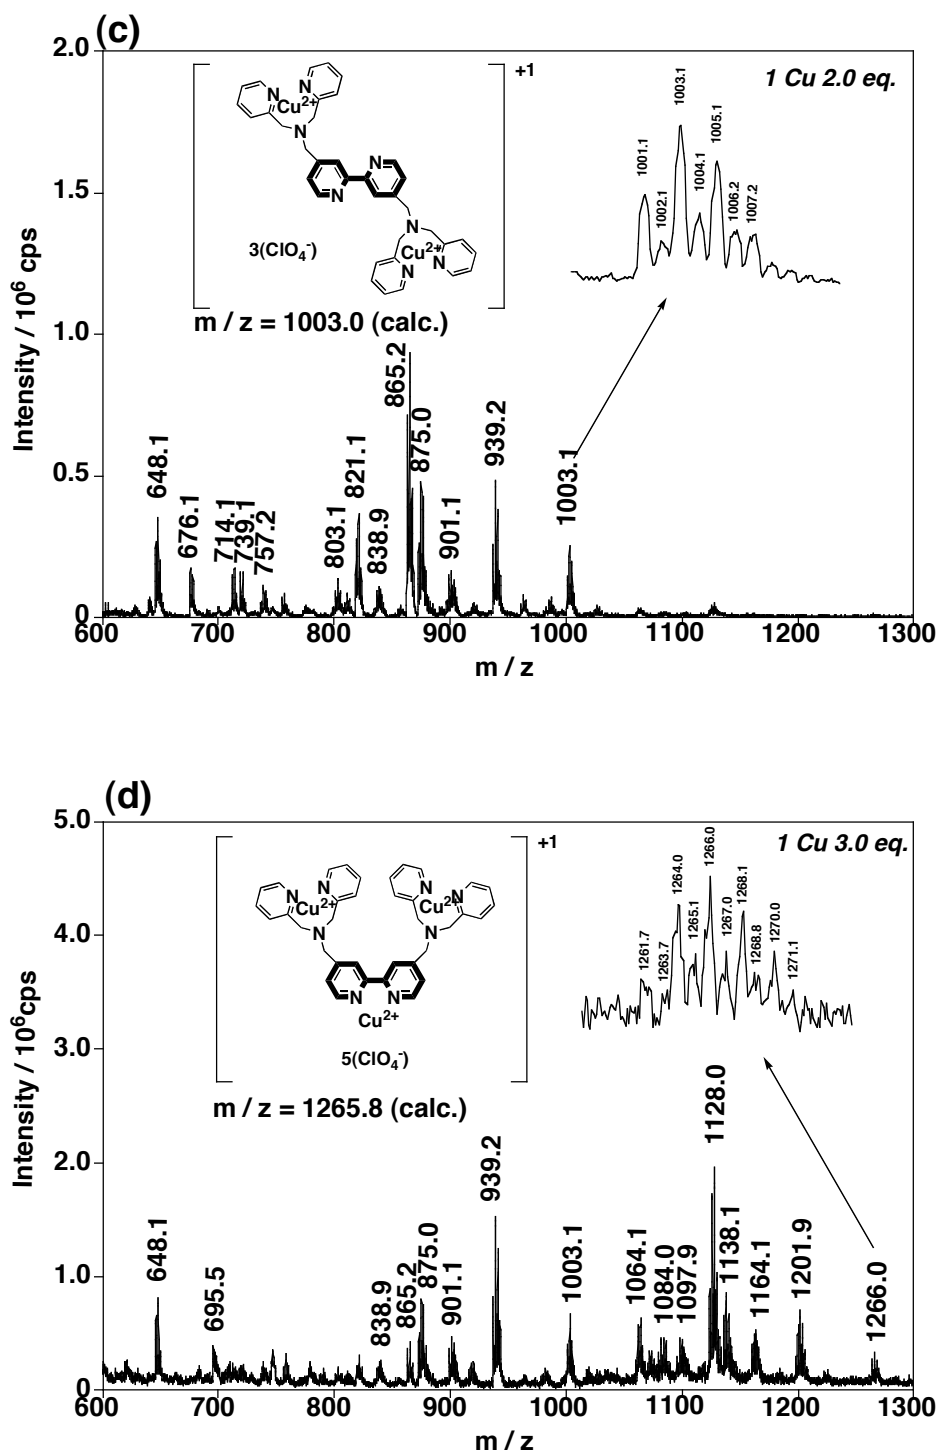

**Figure S3.** ESI MS spectra for (a) ESI MS spectrum for  $[\text{Zn}^{2+}]/[\mathbf{1}] = 2.0$  and (b) 8.0 in 33% ethanol/water (HEPES, 25 mM). ESI MS spectra for (c)  $[\text{Cu}^{2+}]/[\mathbf{1}] = 2.0$  and (d) 3.0 in 33% ethanol/water (HEPES, 25 mM).

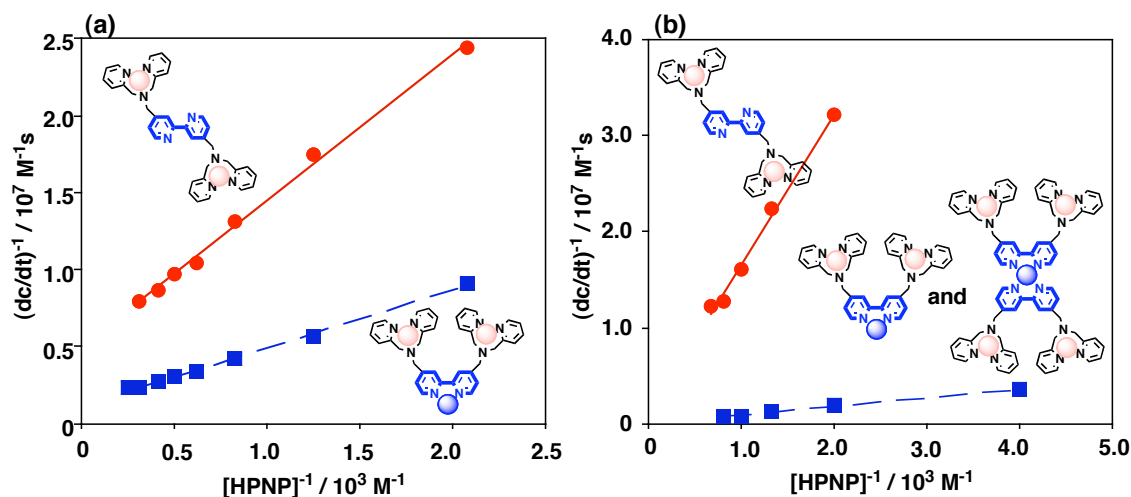

**Figure S4.** Lineweaver-Burk plots for HPNP cleavage; in 33% ethanol/water (HEPES, 25 mM), pH 7.7 at 25 °C; (a) **[1]** = 0.4 mM,  $[\text{Zn}(\text{ClO}_4)_2]$  = 0.80 mM (solid line), **[1]** = 0.40 mM,  $[\text{Zn}(\text{ClO}_4)_2]$  = 2.0 mM (broken line), (b) **[1]** = 1.0 mM,  $[\text{Cu}(\text{ClO}_4)_2]$  = 2.0 mM (solid line), **[1]** = 1.0 mM,  $[\text{Cu}(\text{ClO}_4)_2]$  = 3.0 mM (broken line).

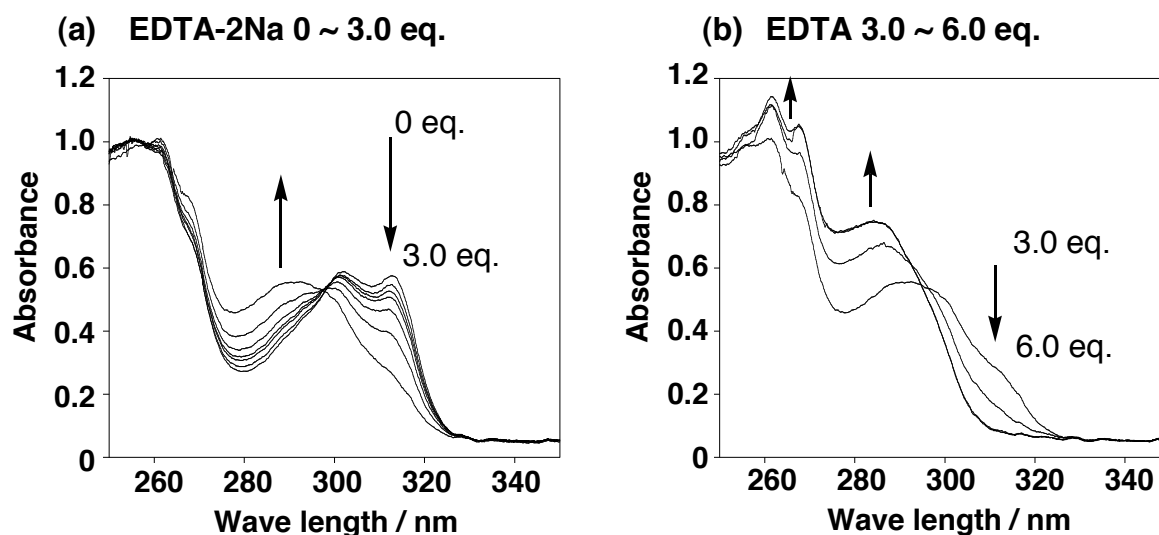

**Fig. S5** UV-Vis spectral changes of  $1 \cdot (\text{Zn}^{2+})_3$  (**[1]** = 0.40 mM,  $[\text{Zn}(\text{ClO}_4)_2]$ ) upon addition of EDTA-2Na ((a) 0-3 equiv., (b) 3-6 equiv.) in 33% ethanol/water (HEPES, 25 mM) at pH 7.7 and 25 °C.
